# Supplementary material for: Controllable synthesis of a narrow polydispersity CO2-based oligo(carbonate-ether) tetraol
Source: Royal Society of Chemistry journal article supplement (doi:10.1039/c5py00556f), 2015-01-01
Supplement: c5py00556f1.pdf [file c5py00556f1.pdf]

## Controllable Synthesis of Narrow Polydispersity CO<sub>2</sub>-Based Oligo(carbonate-ether) tetraol

Shunjie Liu<sup>a,b</sup>, Yuyang Miao<sup>a</sup>, Lijun Qiao<sup>a</sup>, Yusheng Qin<sup>a,\*</sup>, Xianhong Wang<sup>a,\*\*</sup>, Xuesi Chen<sup>a</sup>,  
Fosong Wang<sup>a</sup>

<sup>a</sup>Key Laboratory of Polymer Ecomaterials, Changchun Institute of Applied Chemistry, Chinese Academy of Sciences, Changchun 130022, People's Republic of China.

<sup>b</sup>University of Chinese Academy of Sciences, Beijing 100049, People's Republic of China

\*Corresponding author at: Key Laboratory of Polymer Ecomaterials, Changchun Institute of Applied Chemistry, Chinese Academy of Sciences, Changchun 130022, People's Republic of China.

Fax: +86 0431 85262252; Tel: +86 0431 85262252.

\*\*Corresponding author at: Key Laboratory of Polymer Ecomaterials, Changchun Institute of Applied Chemistry, Chinese Academy of Sciences, Changchun 130022, People's Republic of China.

Fax: +86 0431 85689095; Tel: +86 0431 85262250.

E-mail addresses: ysqin@ciac.ac.cn, xhwang@ciac.ac.cn

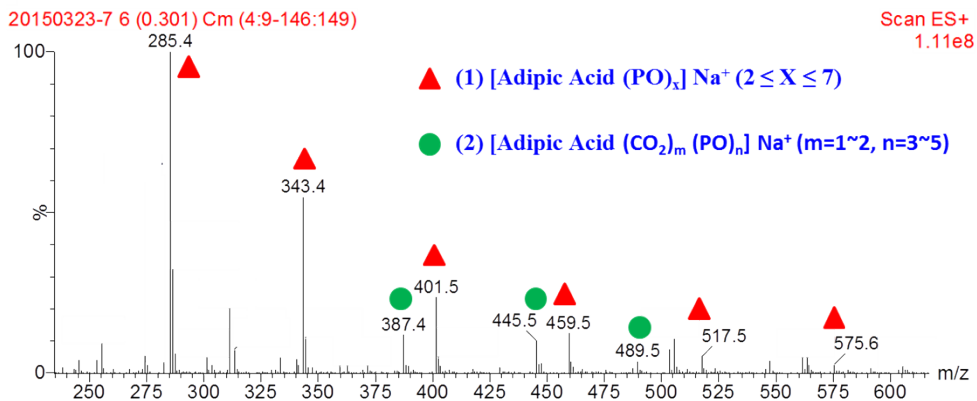

**Fig. S1** ESI-MS spectrum of the product, copolymerization was carried out at 80 °C and 4 MPa for 5 min (less than 10% conversion), where 0.52 g adipic acid ( $n_{\text{COOH}} = 0.007$  mol), 20 mg Zn-Co-DMC catalyst and 10 ml PO were added.

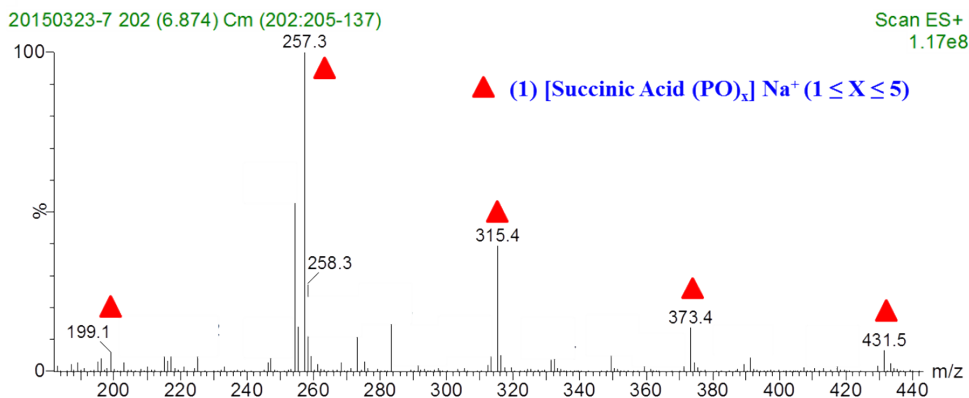

**Fig. S2.** ESI-MS spectrum of the product, the copolymerization was carried out at 80 °C and 4 MPa for 5 min (less than 9% conversion), where 0.42 g succinic acid ( $n_{\text{COOH}} = 0.007$  mol), 20 mg Zn-Co-DMC and 10 ml PO were added.

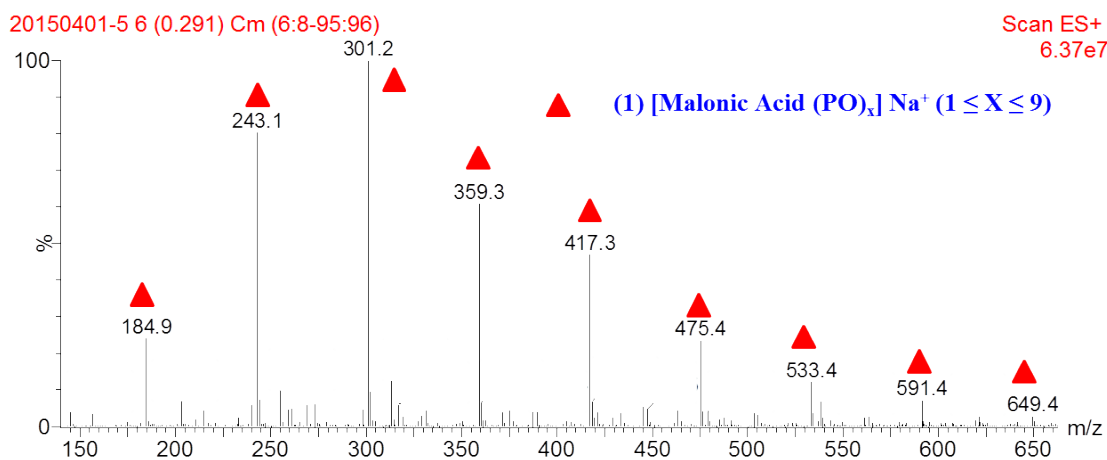

**Fig. S3.** ESI-MS spectrum of the product, the copolymerization was carried out at 80 °C and 4 MPa for 5 min (less than 8% conversion), where 0.37 g malonic acid ( $n_{\text{COOH}} = 0.007$  mol), 20 mg Zn-Co-DMC and 10 ml PO were added.

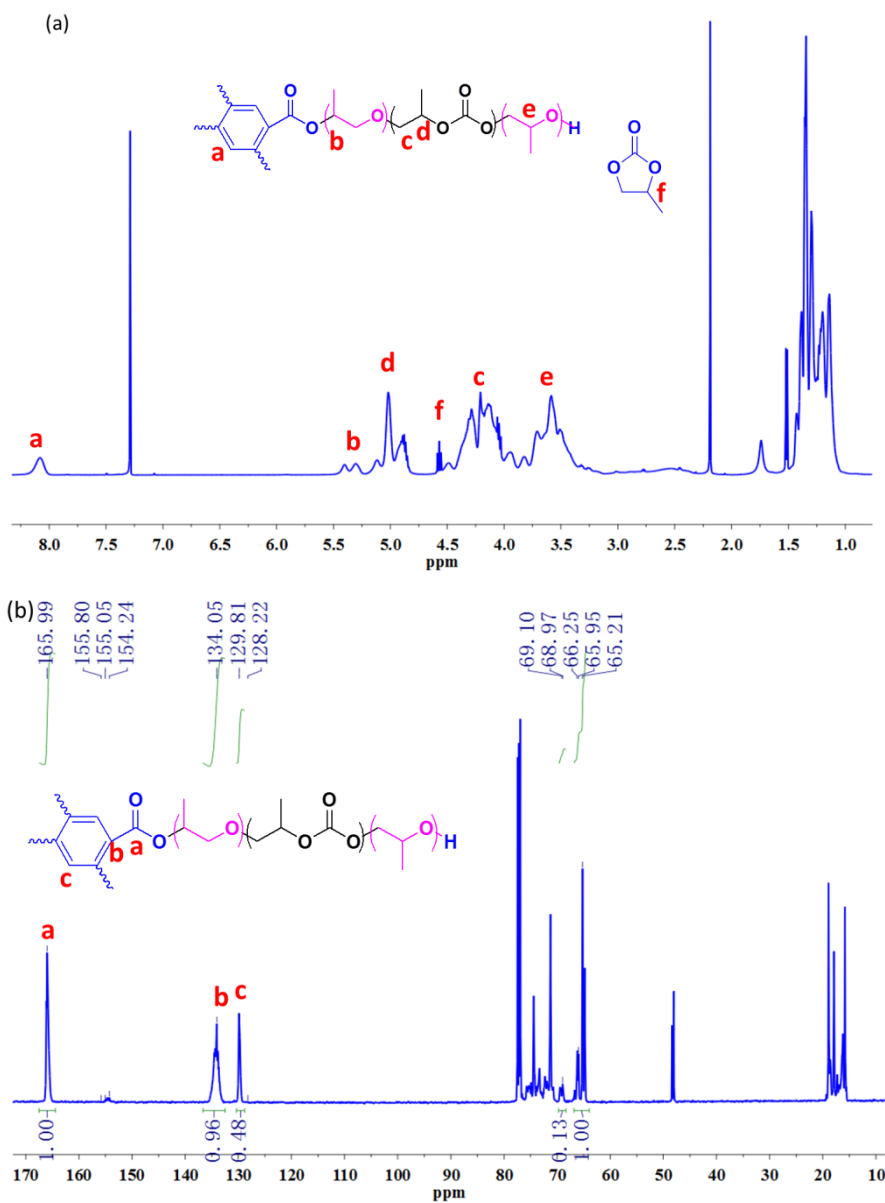

**Fig. S4.**  $^1\text{H}$  NMR spectrum (a) and  $^{13}\text{C}$  NMR spectrum (b) of oligo(carbonate-ether) tetraol from entry 8 Table 1.

(a)

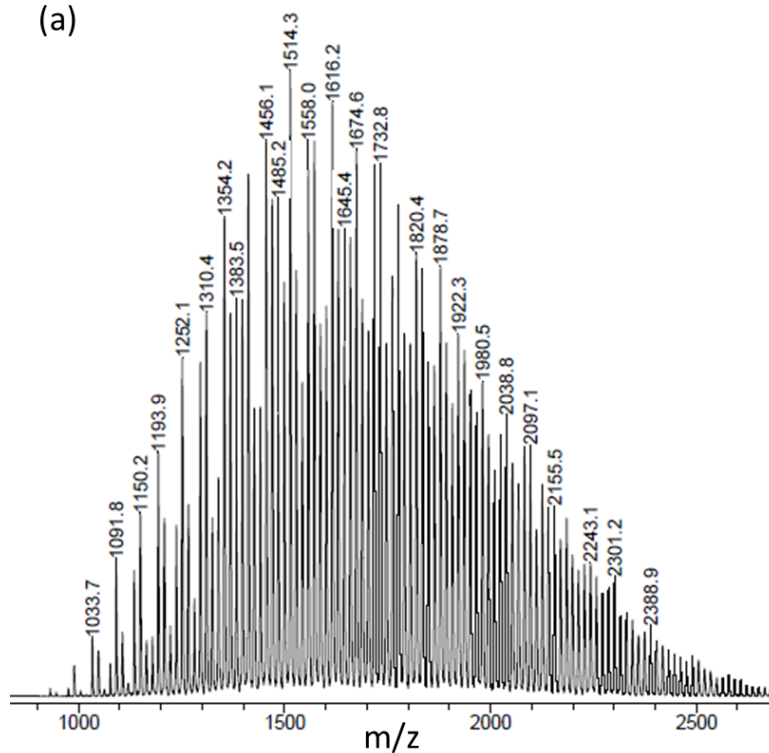

(b) ▲  $\text{btcH}_4(\text{CO}_2\text{-PO})_n\text{PO}_8\text{Na}^+$ ; ▼  $\text{btcH}_4(\text{CO}_2\text{-PO})_n\text{PO}_9\text{Na}^+$ ; ●  $\text{btcH}_4(\text{CO}_2\text{-PO})_n\text{PO}_{10}\text{Na}^+$ ;  
●  $\text{btcH}_4(\text{CO}_2\text{-PO})_n\text{PO}_{11}\text{Na}^+$ ; ★  $\text{btcH}_4(\text{CO}_2\text{-PO})_n\text{PO}_{12}\text{Na}^+$ ; ■  $\text{btcH}_4(\text{CO}_2\text{-PO})_n\text{PO}_{13}\text{Na}^+$ ;  
◆  $\text{btcH}_4(\text{CO}_2\text{-PO})_n\text{PO}_{14}\text{Na}^+$ ;

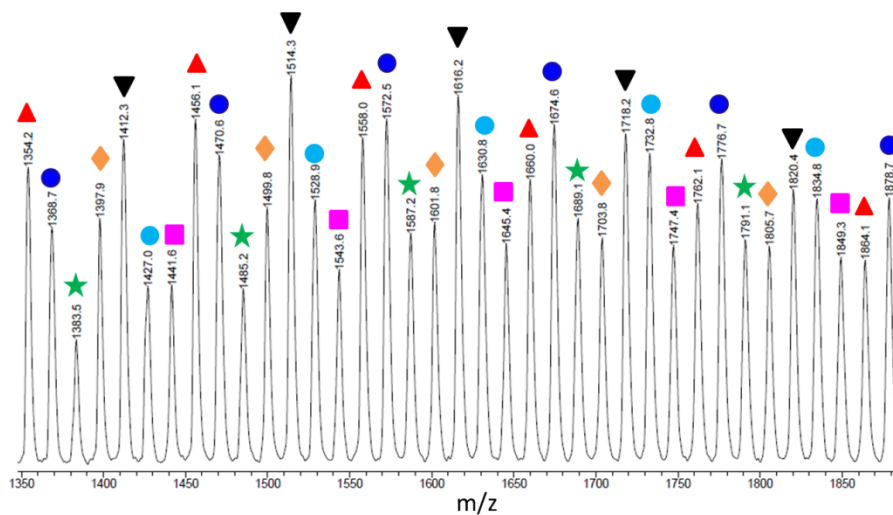

**Fig. S5.** MALDI-TOF-MS spectrum of oligo(carbonate-ether) tetraol (entry 8, Table 1). a: full spectrum, b: mass from 1300 to 1900 g mol<sup>-1</sup>.
